# Supplementary material for: Towards understanding the kinetic behaviour and limitations in photo-induced copper(i) catalyzed azide–alkyne cycloaddition (CuAAC) reactions
Source: Royal Society of Chemistry journal article supplement (doi:10.1039/c6cp04950h), 2016-01-01
Supplement: c6cp04950h1.pdf [file c6cp04950h1.pdf]

Electronic Supplementary Information (ESI):

**Towards understanding the kinetic behavior and limitations in photo-induced copper(I) catalyzed azide-alkyne cycloaddition (CuAAC) reactions**

Bassil M. El-Zaatari, Abhishek U. Shete, Brian J. Adzima and Christopher J. Kloxin

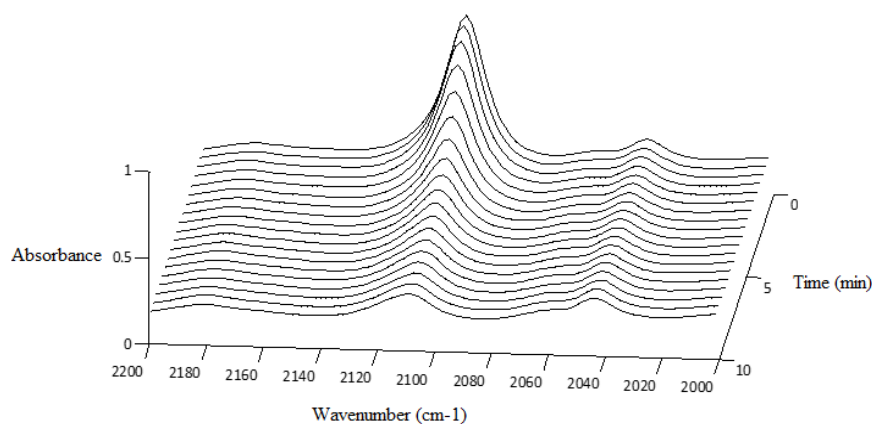

**Figure S1.** The change in absorbance of the azide peak at between 2080 and 2150 cm<sup>-1</sup> over the first 10 minutes of a photo-CuAAC reaction using FTIR spectroscopy. The area under a reference peak at 2044 cm<sup>-1</sup> from the DMF solvent used is constant throughout the reaction.

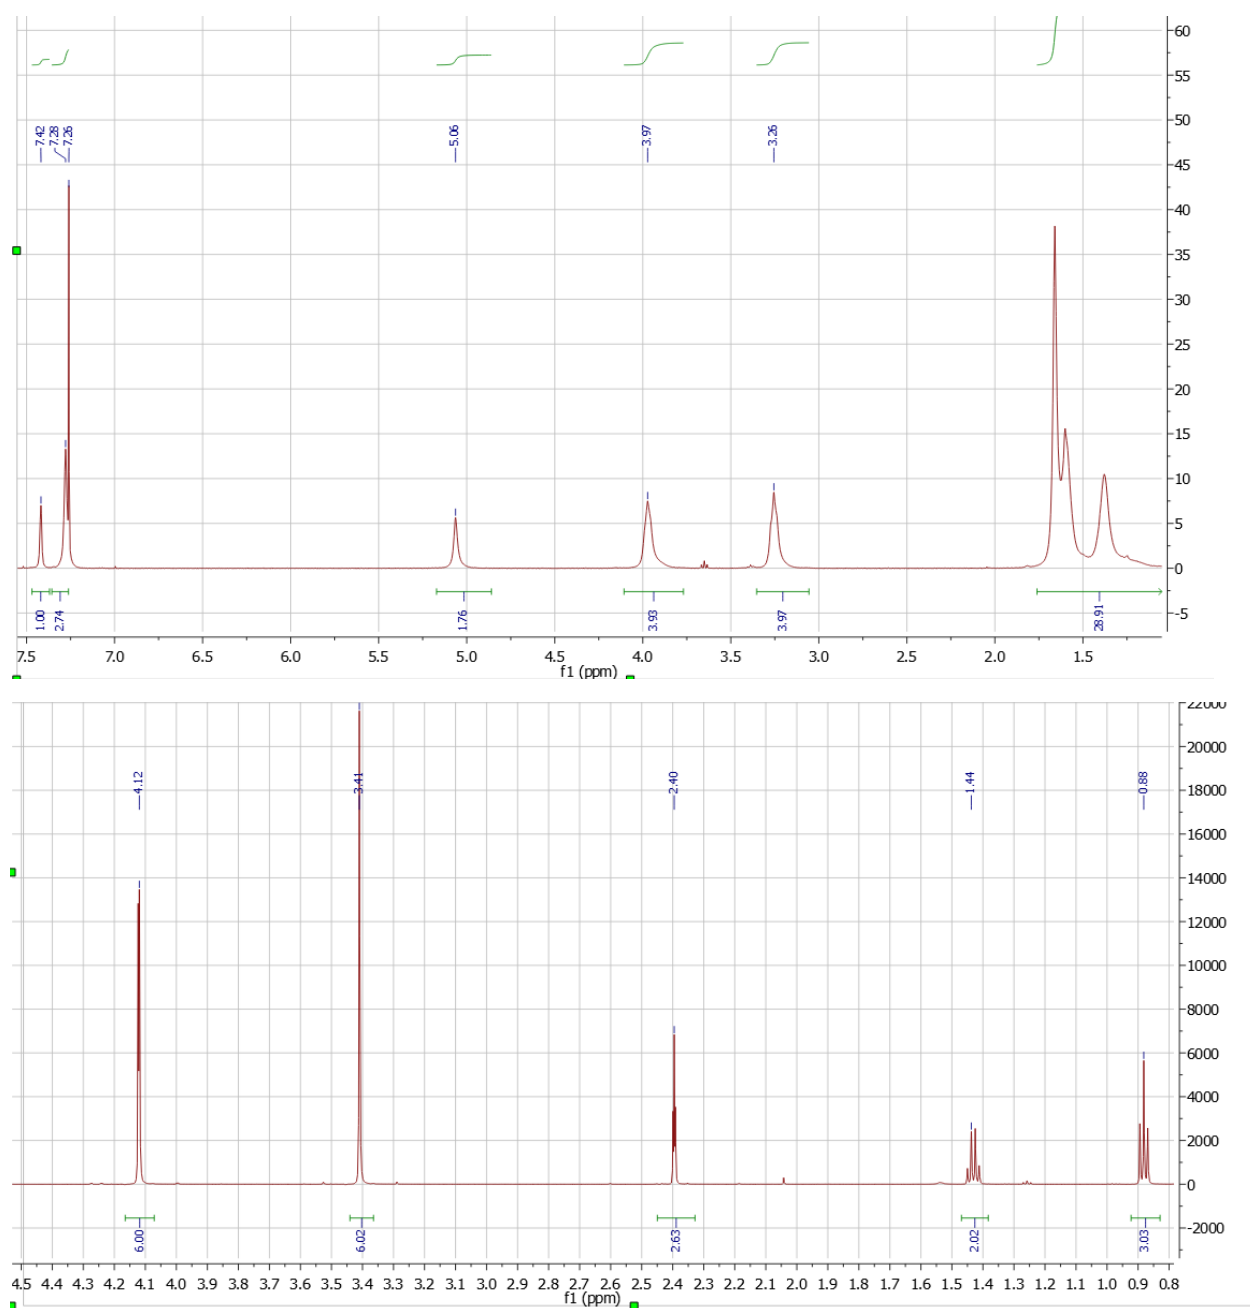

**Figure S2.** H-NMR for monomer **1** (top) and monomer **2** (bottom).

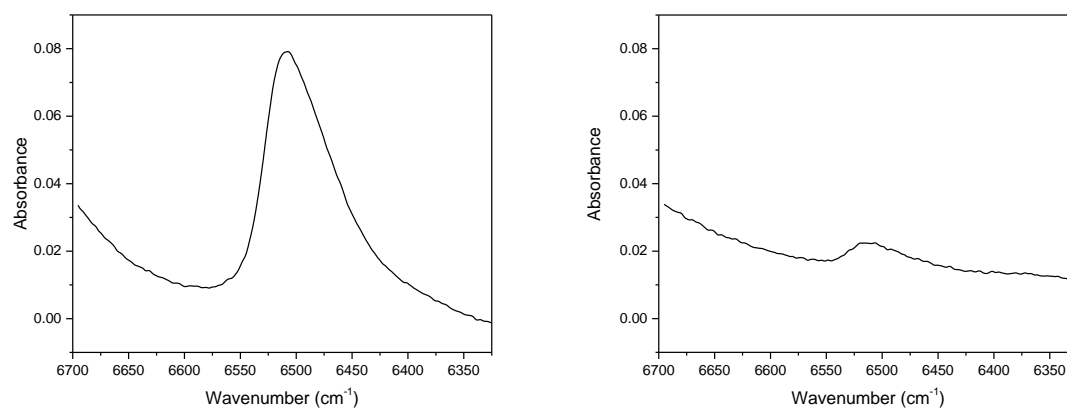

**Figure S3.** The change in absorbance of the near-IR alkyne peak at  $6509\text{ cm}^{-1}$  for the CuAAC polymer system before (left) and after irradiation (right).

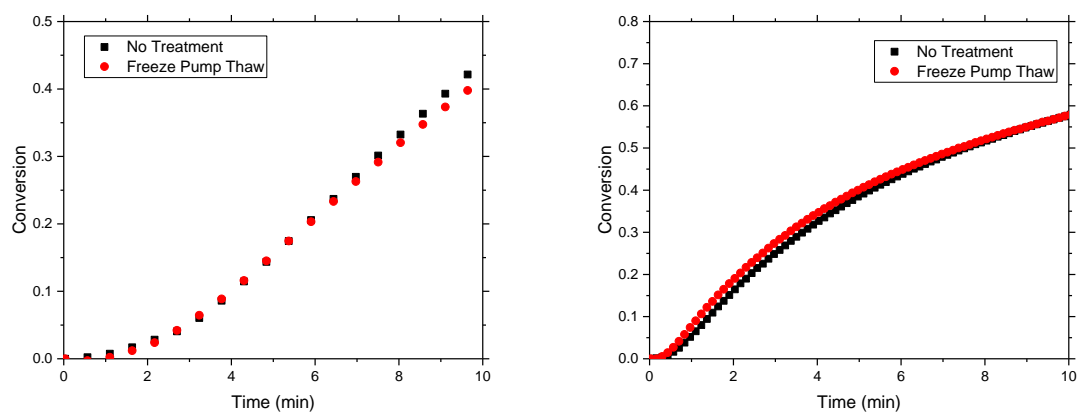

**Figure S4.** Oxygen inhibition effects. Conversion of a system of 110 mM methyl 2-azidoacetate, 110 mM 1-dodecyne, 10 mM copper and 10 mM Irgacure 819 in DMF after subjected to a freeze pump thaw cycle and 30 min of argon purging and without freeze pump thaw (none) at  $2\text{ mW/cm}^2$  (left)  $20\text{ mW/cm}^2$  (right). At both intensities, there is little difference between the conversions of these systems, indicating that oxygen inhibition does not play a significant role in the photo-CuAAC reaction.

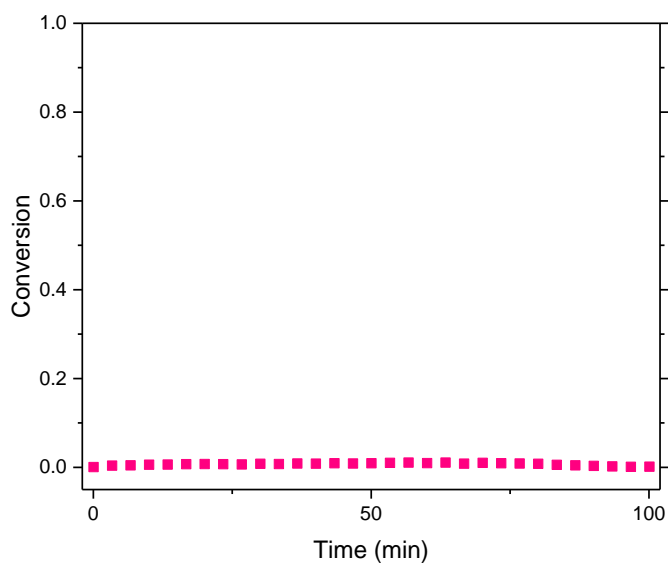

**Figure S5.** Kinetics of methyl 2-azidoacetate decomposition in DMF over 100 minutes of reaction time using 10 mW/cm<sup>2</sup> of 405 nm light. The results show no significant decrease in the concentration of the azide, indicating that negligible azide decomposition occurred.

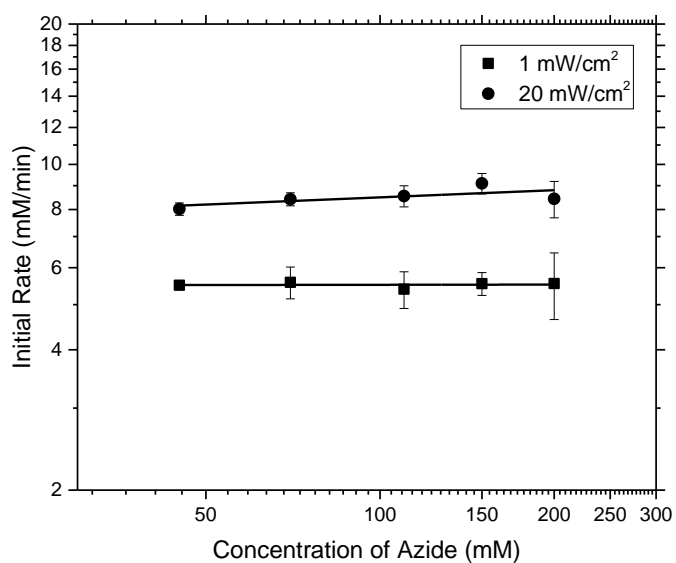

**Figure S6.** The effect of varying methyl 2-azidoacetate concentrations on the initial rate of the reaction with constant photoinitiator and copper(II) concentrations of 10 mM and 1-dodecyne of 110 mM at 1 mW/cm<sup>2</sup> and 20 mW/cm<sup>2</sup> of 405 nm light. The methyl 2-azidoacetate scaling was found to be  $(0.00 \pm 0.01)$  and  $(0.05 \pm 0.03)$  at 1 and 20 mW/cm<sup>2</sup> respectively

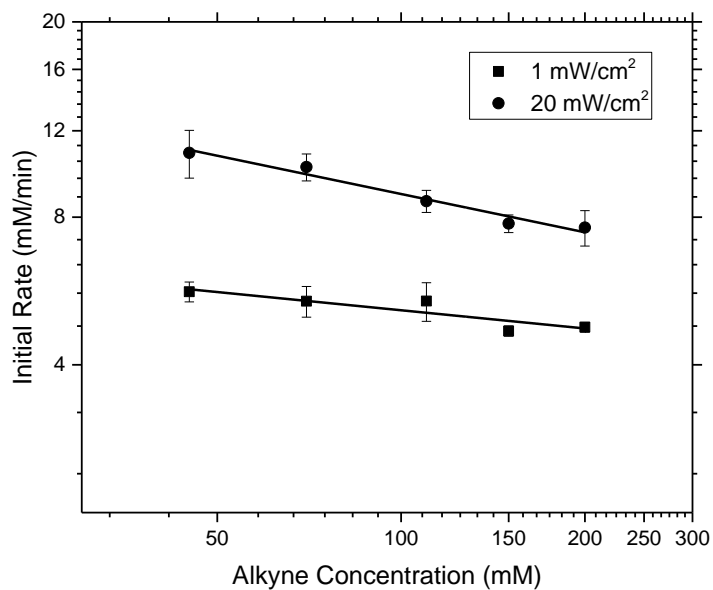

**Figure S7.** The effect of varying 1-dodecyne concentrations on the initial rate of the reaction with constant photoinitiator and copper(II) concentrations of 10 mM and 1-dodecyne of 110 mM at 1 mW/cm<sup>2</sup> and 20 mW/cm<sup>2</sup> of 405 nm light. The 1-dodecyne scaling was between -0.1 and -0.26.

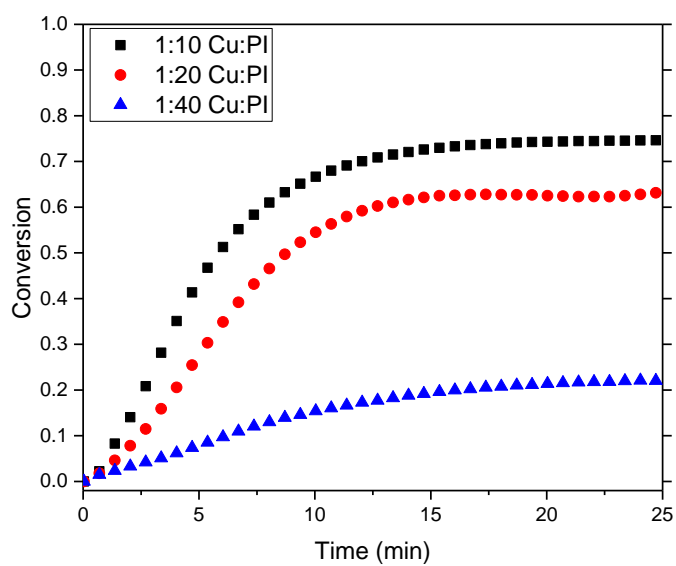

**Figure S8.** Increasing the concentration of photoinitiator beyond that of copper results in a decreased overall conversion of the photo-CuAAC reaction system.

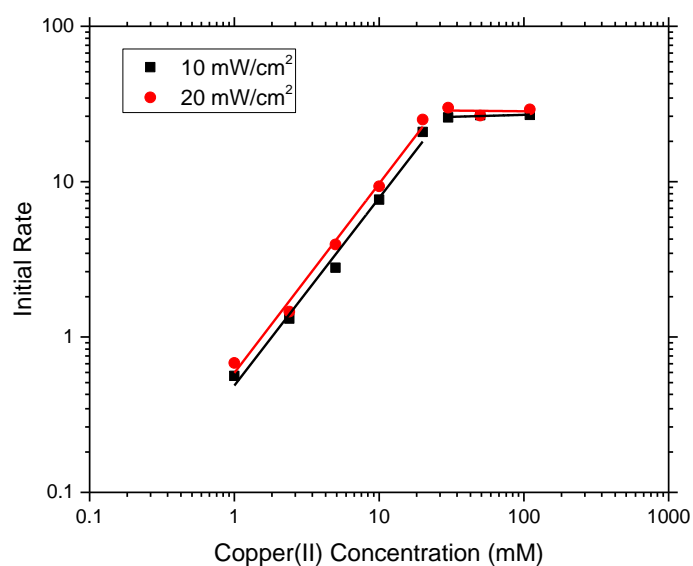

**Figure S9.** Initial rate of the photo-induced CuAAC reaction as a function of varying initial Cu(II) concentration using at 10 and 20 mW/cm<sup>2</sup> intensity of 405 nm light. The other components in the reaction system were 110 mM of methyl 2-azidoacetate and 1-dodecyne and 10 mM of Irgacure 819. Cu(II) initially scales to  $(1.20 \pm 0.07)$  and  $(1.21 \pm 0.06)$  at 10 and 20 mW/cm<sup>2</sup> respectively. After the concentration is increased above 20 mM of Cu(II), the scaling shifts to  $(0.03 \pm 0.02)$  and  $(0.01 \pm 0.09)$  at 10 and 20 mW/cm<sup>2</sup> respectively.

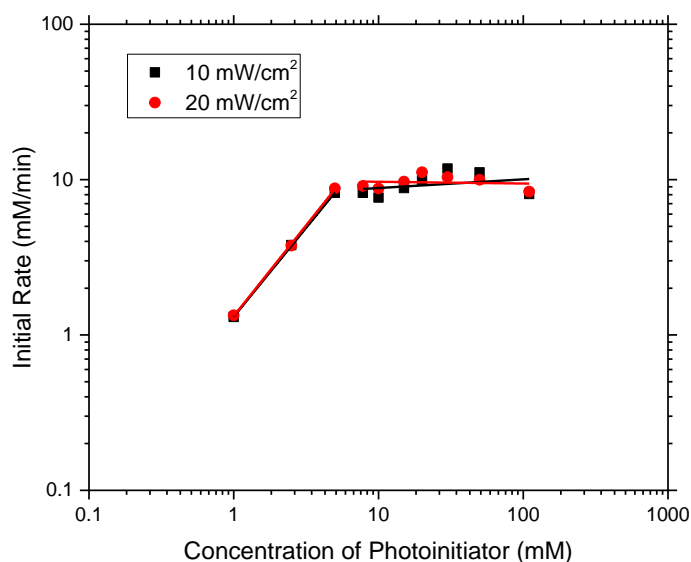

**Figure S10.** Initial rate of the photo-induced CuAAC reaction as a function of varying initial Irgacure 819 concentration using at 10 and 20 mW/cm<sup>2</sup> intensity of 405 nm light. The other components in the reaction system were 110 mM of methyl 2-azidoacetate and 1-dodecyne, and 10 mM of Cu(II). The photoinitiator initially scales to  $(1.14 \pm 0.01)$  and  $(1.17 \pm 0.03)$  at 10 and 20 mW/cm<sup>2</sup> respectively. After the concentration is increased above 20 mM of Cu(II), the scaling shifts to  $(0.06 \pm 0.08)$  and  $(-0.01 \pm 0.05)$  at 10 and 20 mW/cm<sup>2</sup> respectively.

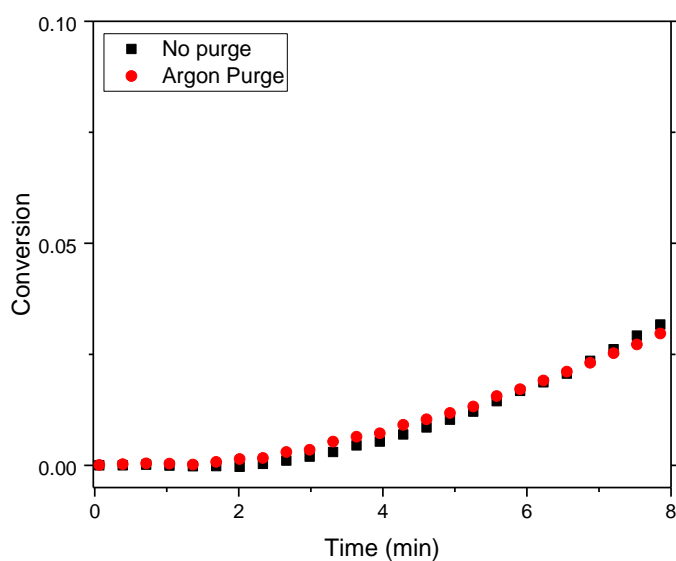

**Figure S11.** The induction period of photo-CuAAC chemistries is not due to oxygen inhibition effects: Conversion of a system of 110 mM methyl 2-azidoacetate, 110 mM 1-dodecyne, 10 mM copper and 10 mM Irgacure 819 in DMF after subjected to 15 minutes of argon purging was nearly identical after 8 minutes of reaction time. The inhibition time was not reduced after the reaction system was purged with argon.

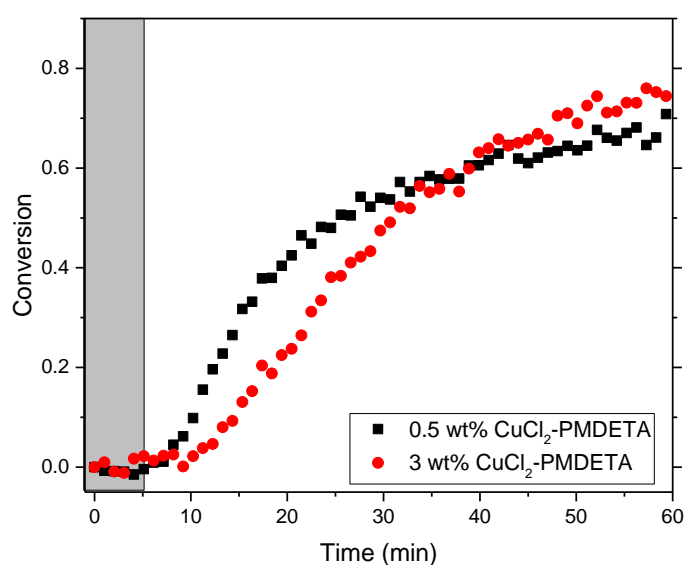

**Figure S12.** Increasing the concentration of copper in photo-CuAAC polymer networks. System consisted of an equimolar functional group concentration of monomer **1** and **2** and 1wt% of Irgacure 819 (405 nm filter bandgap: 1 mW/cm<sup>2</sup>). Sample thickness was 0.12 mm. All samples contained 5wt% MeOH. As the concentration of copper(II) is increased in a photo-CuAAC polymerization, the induction time of the reaction increases.
